# Supplementary material for: Development and validation of a clinical prediction model for detecting coronary heart disease in middle-aged and elderly people: a diagnostic study
Source: Springer Nature journal article supplement (doi:10.1186/s40001-023-01233-0), 2023-09-25
Supplement: MOESM1 [file 26085496]

## Additional file materials

**Table S1** Basic characteristics of patients in the validation set

| Indicators                                | CHD ( <i>n</i> =185) | Non-CHD ( <i>n</i> =66) | Statistics          | <i>P</i> values |
|-------------------------------------------|----------------------|-------------------------|---------------------|-----------------|
| <b>Demographics</b>                       |                      |                         |                     |                 |
| Male, N (%)                               | 84 (45.41)           | 28 (42.42)              | 0.175 <sup>a</sup>  | 0.676           |
| Age, years                                | 66 (56.5, 75)        | 64 (56, 69)             | 2.441 <sup>b</sup>  | 0.015           |
| BMI, kg/m <sup>2</sup>                    | 25.77±2.34           | 26.48±2.89              | 2.846 <sup>b</sup>  | 0.093           |
| <b>Past medical history</b>               |                      |                         |                     |                 |
| Smoking, N (%)                            | 57 (30.81)           | 19 (28.79)              | 0.094 <sup>a</sup>  | 0.759           |
| Diabetes, N (%)                           | 80 (43.24)           | 27 (40.91)              | 0.108 <sup>a</sup>  | 0.742           |
| Hypertension, N (%)                       | 91 (49.19)           | 35 (53.03)              | 0.287 <sup>a</sup>  | 0.592           |
| Heart failure NYHA I-II, N (%)            | 12 (6.49)            | 3 (4.55)                | 0.326 <sup>a</sup>  | 0.568           |
| Atrial fibrillation, N (%)                | 7 (3.78)             | 1 (1.52)                | 0.811 <sup>a</sup>  | 0.368           |
| <b>Prior medication use</b>               |                      |                         |                     |                 |
| Anti-platelet, N (%)                      | 149 (80.54)          | 50 (75.76)              | 0.678 <sup>a</sup>  | 0.410           |
| Statins, N (%)                            | 140 (75.68)          | 47 (71.21)              | 0.510 <sup>a</sup>  | 0.475           |
| ACEI/ARB, N (%)                           | 87 (47.03)           | 32 (48.48)              | 0.041 <sup>a</sup>  | 0.839           |
| Beta-blockers, N (%)                      | 152 (82.16)          | 54 (81.82)              | 0.004 <sup>a</sup>  | 0.950           |
| CCB, N (%)                                | 85 (45.95)           | 36 (54.55)              | 1.441 <sup>a</sup>  | 0.230           |
| Nitrates, N (%)                           | 75 (40.54)           | 23 (34.85)              | 0.662 <sup>a</sup>  | 0.416           |
| <b>Laboratory values</b>                  |                      |                         |                     |                 |
| ALT, IU/L                                 | 17 (13, 24)          | 21 (17, 30.5)           | -0.816 <sup>b</sup> | 0.414           |
| AST, IU/L                                 | 18 (15, 22)          | 17 (14.5, 21.5)         | 0.981 <sup>b</sup>  | 0.327           |
| Scr, μmol/L                               | 62.4 (55.55, 73.35)  | 65.9 (54.25, 76.35)     | 1.052 <sup>b</sup>  | 0.293           |
| Hs-CRP, mg/L                              | 1.47 (0.76, 2.72)    | 1.54 (0.62, 2.573)      | 0.866 <sup>b</sup>  | 0.387           |
| TC, mmol/L                                | 3.97±1.09            | 4.12±0.95               | 1.407 <sup>b</sup>  | 0.237           |
| TG, mmol/L                                | 1.26 (0.98, 1.8)     | 1.36 (1.06, 1.95)       | -2.103 <sup>b</sup> | 0.035           |
| LDL-C, mmol/L                             | 2.43±0.8             | 2.56±0.69               | 2.110 <sup>b</sup>  | 0.148           |
| HDL-C, mmol/L                             | 1.17 (0.96, 1.38)    | 1.03 (0.91, 1.29)       | -0.409 <sup>b</sup> | 0.683           |
| HCY, μmol/L                               | 12.7 (9.81, 15.84)   | 13.58 (10.94, 14.99)    | 0.507 <sup>b</sup>  | 0.612           |
| HbA1c, %                                  | 6.2 (5.7, 7.55)      | 5.7 (5.6, 6.25)         | 2.418 <sup>b</sup>  | 0.016           |
| NT-proBNP, pg/mL                          | 80 (54, 90)          | 70 (36.5, 94.5)         | 1.659 <sup>b</sup>  | 0.097           |
| <b>Arterial stiffness indices</b>         |                      |                         |                     |                 |
| baPWV, m/s                                | 19.85 (16.54, 23)    | 17.5 (15.89, 20.07)     | 2.345 <sup>b</sup>  | 0.019           |
| ABI                                       | 1.12 (1.04, 1.22)    | 1.15 (1.09, 1.29)       | -2.621 <sup>b</sup> | 0.009           |
| <b>Vascular endothelial function test</b> |                      |                         |                     |                 |
| FMD, %                                    | 7.2 (6.7, 8.4)       | 9.1 (8.35, 10)          | -5.092 <sup>b</sup> | <0.001          |
| <b>Echocardiographic values</b>           |                      |                         |                     |                 |
| LAD, mm                                   | 37.7±5.18            | 37.12±4.02              | 2.748 <sup>b</sup>  | 0.099           |
| LVEF, %                                   | 69 (65, 72)          | 69 (66.5, 71.5)         | -1.926 <sup>b</sup> | 0.054           |
| LVMI, g/m <sup>2</sup>                    | 90.9±23.61           | 88.78±21.44             | 1.691 <sup>b</sup>  | 0.195           |

Data were expressed as means±standard deviations or as medians with interquartile ranges or as frequencies and percentages

CHD, coronary atherosclerotic heart disease; BMI, body mass index; ACEI, angiotensin converting enzyme inhibitor; ARB, angiotensin receptor blocker; CCB, calcium channel blockers; ALT, alanine aminotransferase; AST, aspartate aminotransferase; Scr, serum creatinine; Hs-CRP, hypersensitive C-reactive protein; TC, total cholesterol; TG, triglyceride; LDL-C, low-density lipoprotein cholesterol; HDL-C, high-density lipoprotein cholesterol; HCY, homocysteine; HbA1c, hemoglobin A1c; NT-proBNP, N-terminal pro-B-type natriuretic peptide; baPWV, brachial-ankle pulse wave velocity; ABI, ankle-brachial index; FMD, brachial artery flow-mediated vasodilatation; LAD, left atrium diameter; LVEF, left ventricular ejection fraction; LVMI, left ventricular mass index; <sup>a</sup>χ<sup>2</sup> value; <sup>b</sup>Z value
